# Supplementary material for: Production of an Anise- and Woodruff-like Aroma by Monokaryotic Strains of Pleurotus sapidus Grown on Citrus Side Streams
Source: MDPI journal article supplement (doi:10.3390/molecules27030651), 2022-01-19
Supplement: s1 [file s1]

# Production of an Anise- and Woodruff-like Aroma by Monokaryotic Strains of *Pleurotus sapidus* Grown on *Citrus* Side Streams

Friederike Bürger <sup>1</sup>, Maximilian Koch <sup>1</sup>, Marco A. Fraatz <sup>1,2</sup>, Alejandra B. Omarini <sup>3,4</sup>, Ralf G. Berger <sup>4</sup> and Holger Zorn <sup>1,2,\*</sup>

<sup>1</sup> Institute of Food Chemistry and Food Biotechnology, Justus Liebig University Giessen, Heinrich-Buff-Ring 17, 35392 Giessen, Germany; friederike.buerger@lcb.chemie.uni-giessen.de (F.B.); maximilian.koch@lc.chemie.uni-giessen.de (M.K.); marco.fraatz@lcb.chemie.uni-giessen.de (M.A.F.); holger.zorn@uni-giessen.de (H.Z.)

<sup>2</sup> Fraunhofer Institute for Molecular Biology and Applied Ecology, Ohlebergsweg 12, 35392 Giessen, Germany

<sup>3</sup> CONICET Asociación para el Desarrollo de Villa Elisa y Zona Héctor de Elia 1247, E3265 Villa Elisa (Entre Ríos), Argentina; alejandra.omarini@adesarrollo.com.ar

<sup>4</sup> Institute of Food Chemistry, Leibniz University Hannover, Callinstrasse 5, 30167 Hannover, Germany; rg.berger@lci.uni-hannover.de

\* Correspondence: holger.zorn@uni-giessen.de; Tel.: +49-(0)-641-99-349-00

## Supplementary Material

**Table S1:** Classification of PSA strains into odor categories after surface cultivation on *Citrus*-supplemented medium; 1: musty, unpleasant, 2: PSA-typical, but weak and partly with off-notes, 3: PSA-typical, 4: woodruff-like, coumarin, herbaceous and partly sweetish, Dk: dikaryon, Mk: monokaryon.

| Categorie 1 | Categorie 2 | Categorie 3 | Categorie 4 |
|-------------|-------------|-------------|-------------|
| Mk 106      | Dk 69       | Mk 13       | Mk 37       |
| Mk 125      | Mk 1        | Mk 19       | Mk 41       |
| Mk 209      | Mk 2        | Mk 28       | Mk 49       |
| Mk 214      | Mk 5        | Mk 33       | Mk 57       |
| Mk 232      | Mk 15       | Mk 34       | Mk 55       |
| Mk 233      | Mk 27       | Mk 38       | Mk 74       |
|             | Mk 31       | Mk 90       | Mk 117      |
|             | Mk 32       | Mk 100      | Mk 124      |
|             | Mk 45       | Mk 101      | Mk 126      |
|             | Mk 60       | Mk 103      | Mk 216      |
|             | Mk 70       | Mk 113      | Mk 229      |
|             | Mk 78       | Mk 127      |             |
|             | Mk 82       | Mk 201      |             |
|             | Mk 85       | Mk 219      |             |

---

|         |        |
|---------|--------|
| Mk 88   | Mk 225 |
| Mk 93   | Mk 234 |
| Mk 96   |        |
| Dk 3174 |        |
| Mk 107  |        |
| Mk 108  |        |
| Mk 115  |        |
| Mk 119  |        |
| Mk 129  |        |
| Mk 132  |        |
| Mk 203  |        |
| Mk 217  |        |
| Mk 223  |        |
| Mk 226  |        |
| Mk 228  |        |

---

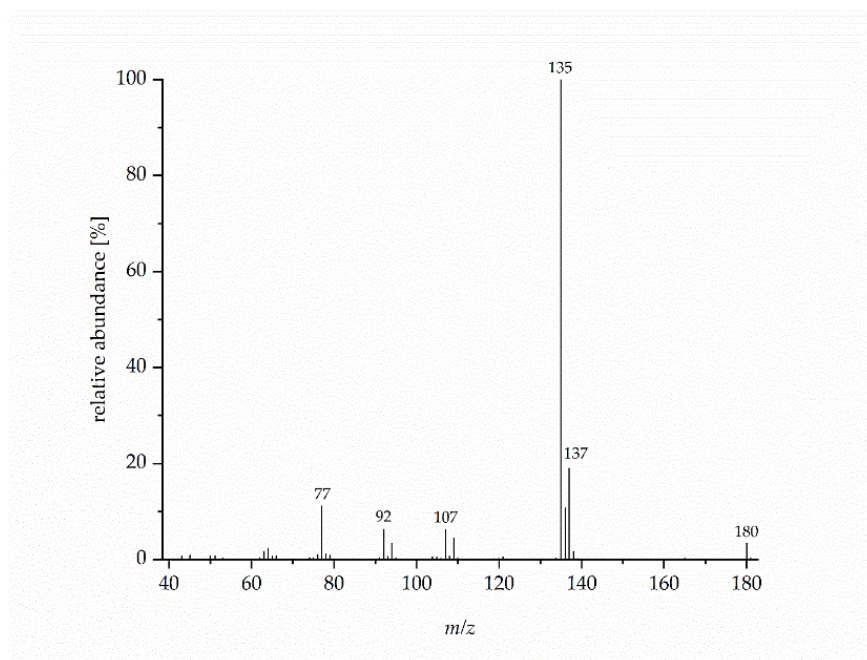

**Figure S1** Mass spectrum (EI, 70 eV) of 2-HPP 48.

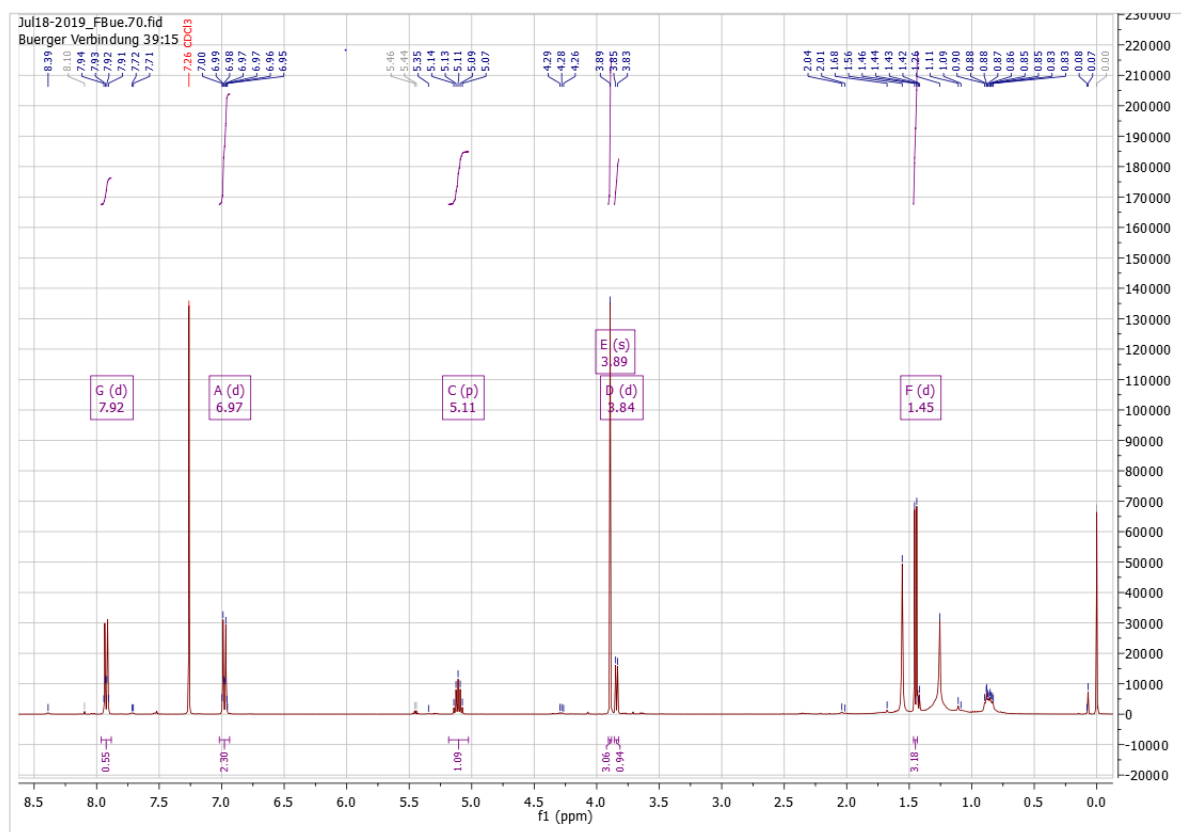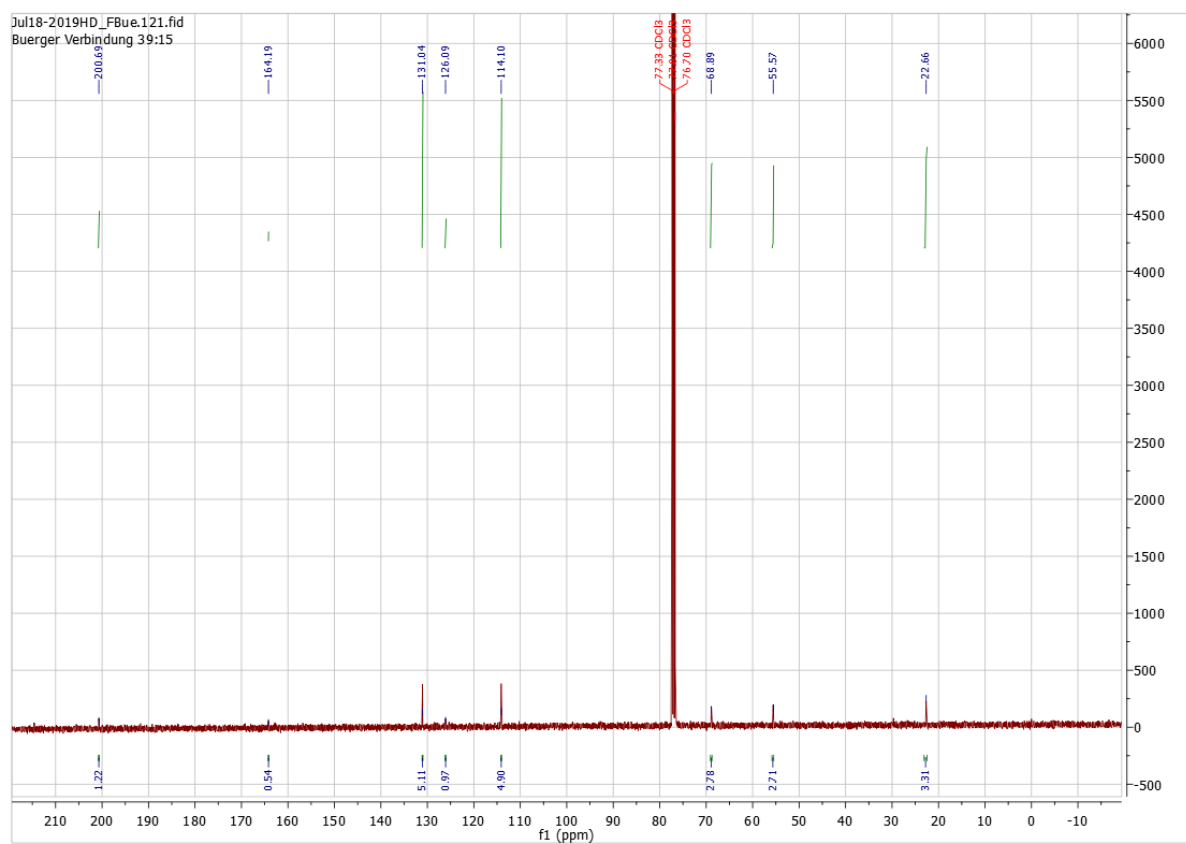

Figure S2  $^1\text{H}$  and  $^{13}\text{C}$  NMR spectra of 2-HPP 48.

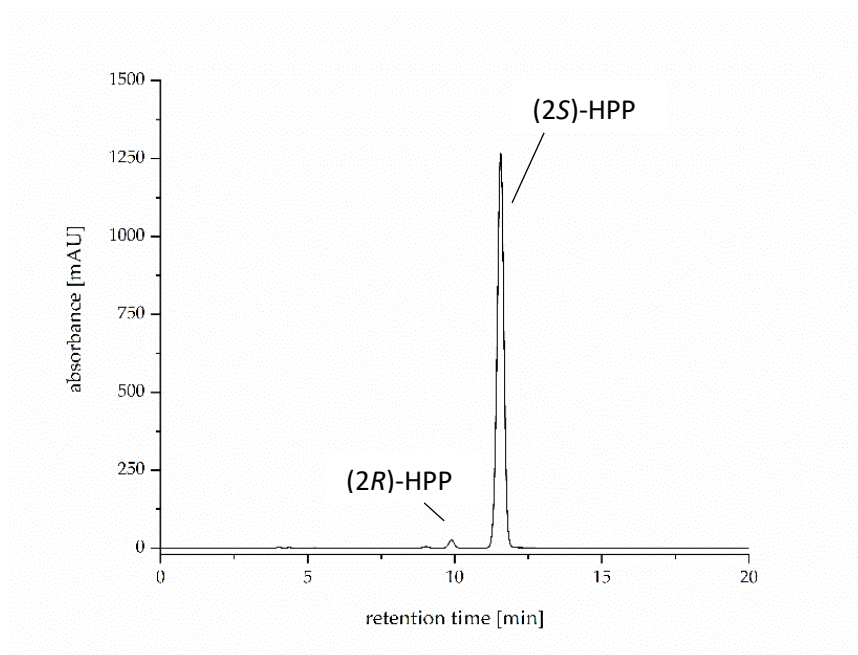

**Figure S3** Chromatogram of isolated 2-HPP **48** by chiral HPLC analysis.

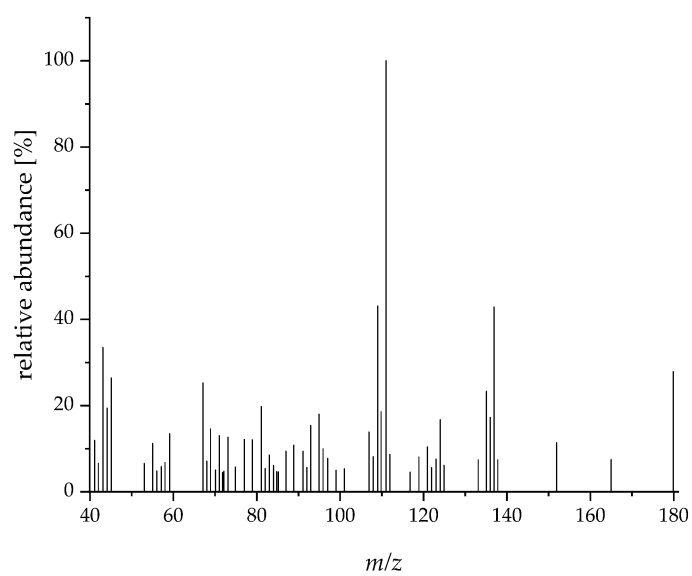

**Figure S4** Mass spectrum (EI, 70 eV) of **42**.

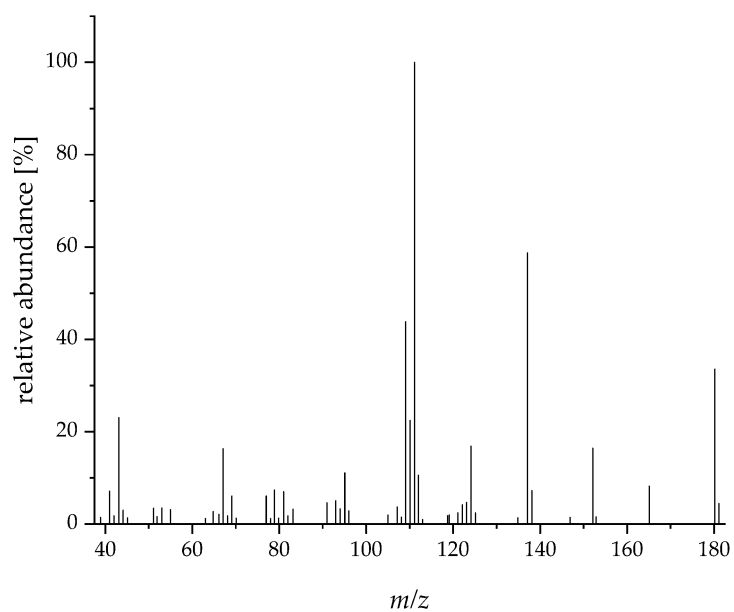

**Figure S5** Mass spectrum (EI, 70 eV) of 5,6,7,7a-tetrahydro-4,4,7a-trimethyl-2(4H)-benzofuranone.

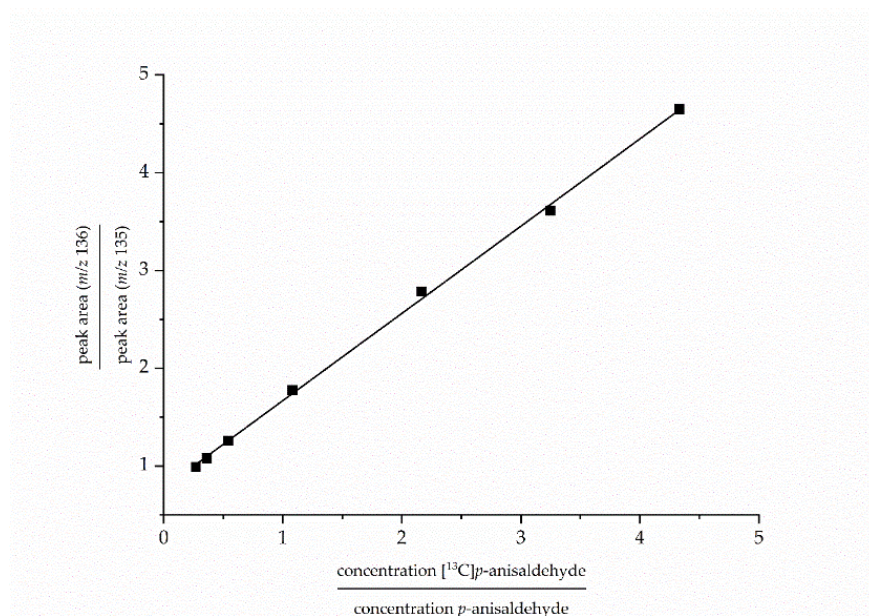

**Figure S6** Calibration curve obtained by gas chromatography-mass spectrometry of defined mixtures of  $p$ -anisaldehyde and  $[^{13}\text{C}]p$ -anisaldehyde.

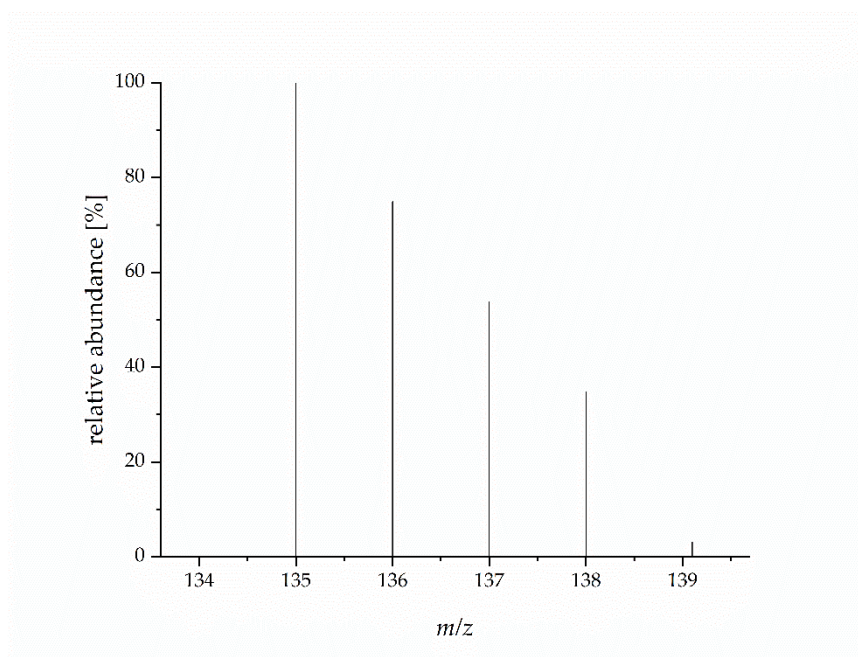

**Figure S7** Section of mass spectrum (EI, 70 eV) of [3,5- $^2\text{H}$ ]-4-methoxybenzaldehyde of PSA Dk culture supplemented with L-2-amino-3-([3,5- $^2\text{H}$ ]-4-hydroxyphenyl)-propanoic acid.

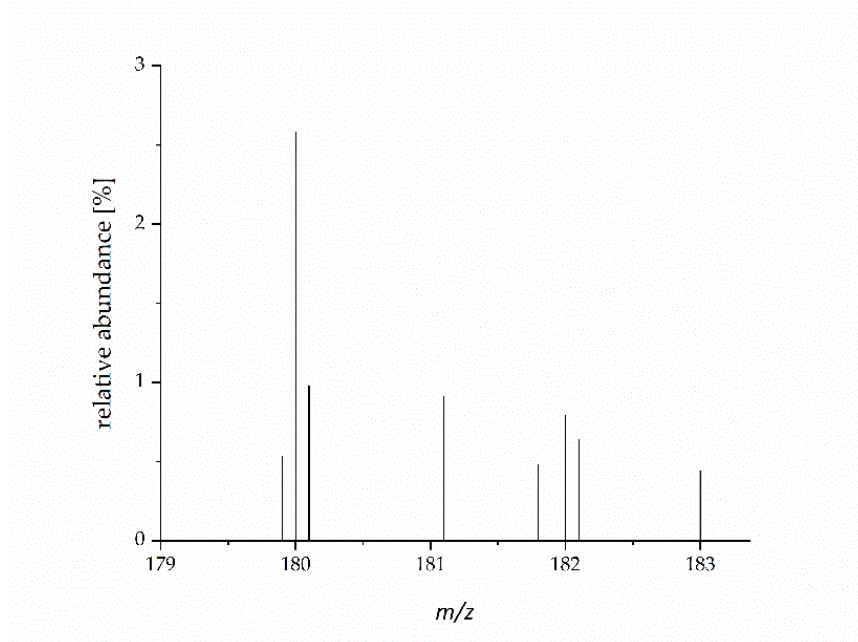

**Figure S8** Section of mass spectrum (EI, 70 eV) of 2-hydroxy-1-([3,5- $^2\text{H}$ ]-4-methoxyphenyl)-1-propanone of PSA Dk culture supplemented with L-2-amino-3-([3,5- $^2\text{H}$ ]-4-hydroxyphenyl)-propanoic acid.



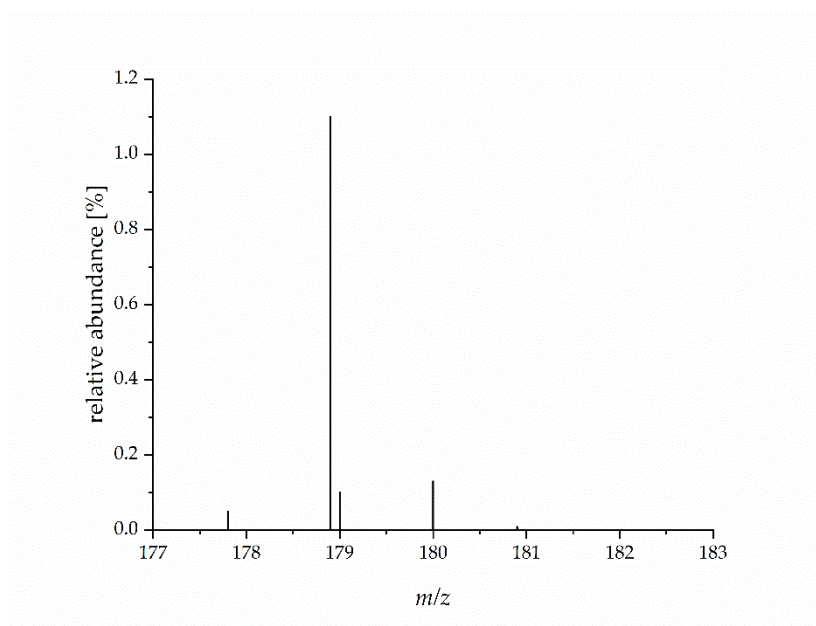

**Figure S9** Section of mass spectrum (EI, 70 eV) of 1-(4-methoxyphenyl)propane-1,[2-<sup>13</sup>C]-dione.

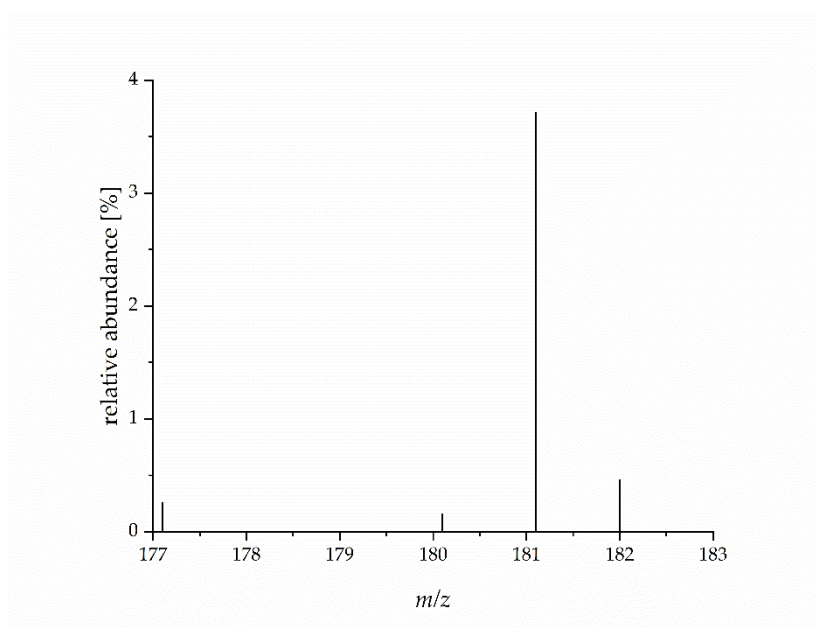

**Figure S10** Section of mass spectrum (EI, 70 eV) of [2-<sup>13</sup>C]-hydroxy-1-(4-methoxyphenyl)-1-propanone after biotransformation of 1-(4-methoxyphenyl)propane-1,[2-<sup>13</sup>C]-dione by PSA Mk 37 lyophilisate.

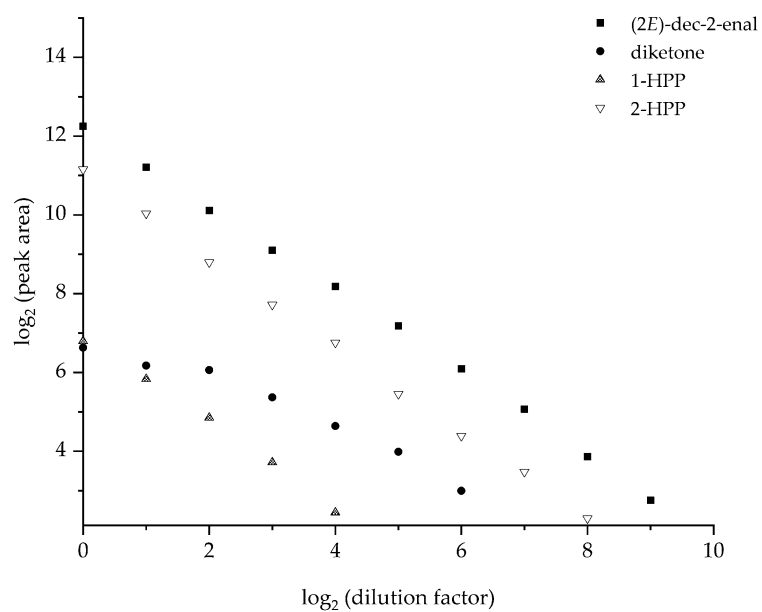

**Figure S11** Log<sub>2</sub>-plotting of the peak areas of detected compounds against the dilution factor, analyzed by gas chromatography-flame ionization detection.
